# Supplementary material for: Integrated Pharmacodynamic Analysis Identifies Two Metabolic Adaption Pathways to Metformin in Breast Cancer
Source: PubMed Central journal article supplement (PMC6224605; doi:10.1016/j.cmet.2018.08.021), 2018-11-06
Supplement: mmc1.pdf [file mmc1.pdf]

**Supplemental Information**

**Integrated Pharmacodynamic Analysis**

**Identifies Two Metabolic Adaption**

**Pathways to Metformin in Breast Cancer**

**Simon R. Lord, Wei-Chen Cheng, Dan Liu, Edoardo Gaude, Syed Haider, Tom Metcalf, Neel Patel, Eugene J. Teoh, Fergus Gleeson, Kevin Bradley, Simon Wigfield, Christos Zois, Daniel R. McGowan, Mei-Lin Ah-See, Alastair M. Thompson, Anand Sharma, Luc Bidaut, Michael Pollak, Pankaj G. Roy, Fredrik Karpe, Tim James, Ruth English, Rosie F. Adams, Leticia Campo, Lisa Ayers, Cameron Snell, Ioannis Roxanis, Christian Frezza, John D. Fenwick, Francesca M. Buffa, and Adrian L. Harris**

## **Supplemental information**

### **Integrated pharmacodynamic analysis identifies two metabolic adaption pathways to metformin in breast cancer**

#### **Authors:**

Simon. R. Lord, Wei-Chen. Cheng, Dan. Liu, Edoardo. Gaude, Syed. Haider, Tom. Metcalf, Neel. Patel, Eugene. J. Teoh, Fergus. Gleeson, Kevin. Bradley, Simon. Wigfield, Christos. Zois, Daniel. R. McGowan, Mei-Lin. Ah-See, Alastair. M. Thompson, Anand. Sharma, Luc. Bidaut, Michael. Pollak, Pankaj. G. Roy, Fredrik. Karpe, Tim. James, Ruth. English, Rosie. F. Adams, Leticia Campo, Lisa. Ayers, Cameron Snell, Ioannis Roxanis, Christian. Frezza, John. D. Fenwick, Francesca. M. Buffa, Adrian. L. Harris

#### **Inventory of Supplemental Information**

##### **SUPPLEMENTAL FIGURES:**

**Figure S1.**

**Figure S2.**

**Figure S3.**

**Figure S4.**

**Figure S5.**

##### **SUPPLEMENTAL TABLES:**

**Table S1.**

**Table S2.**

**Table S3.**

**Table S4.**

**Table S5.**

**Table S6.**

**SUPPLEMENTAL FIGURES:**

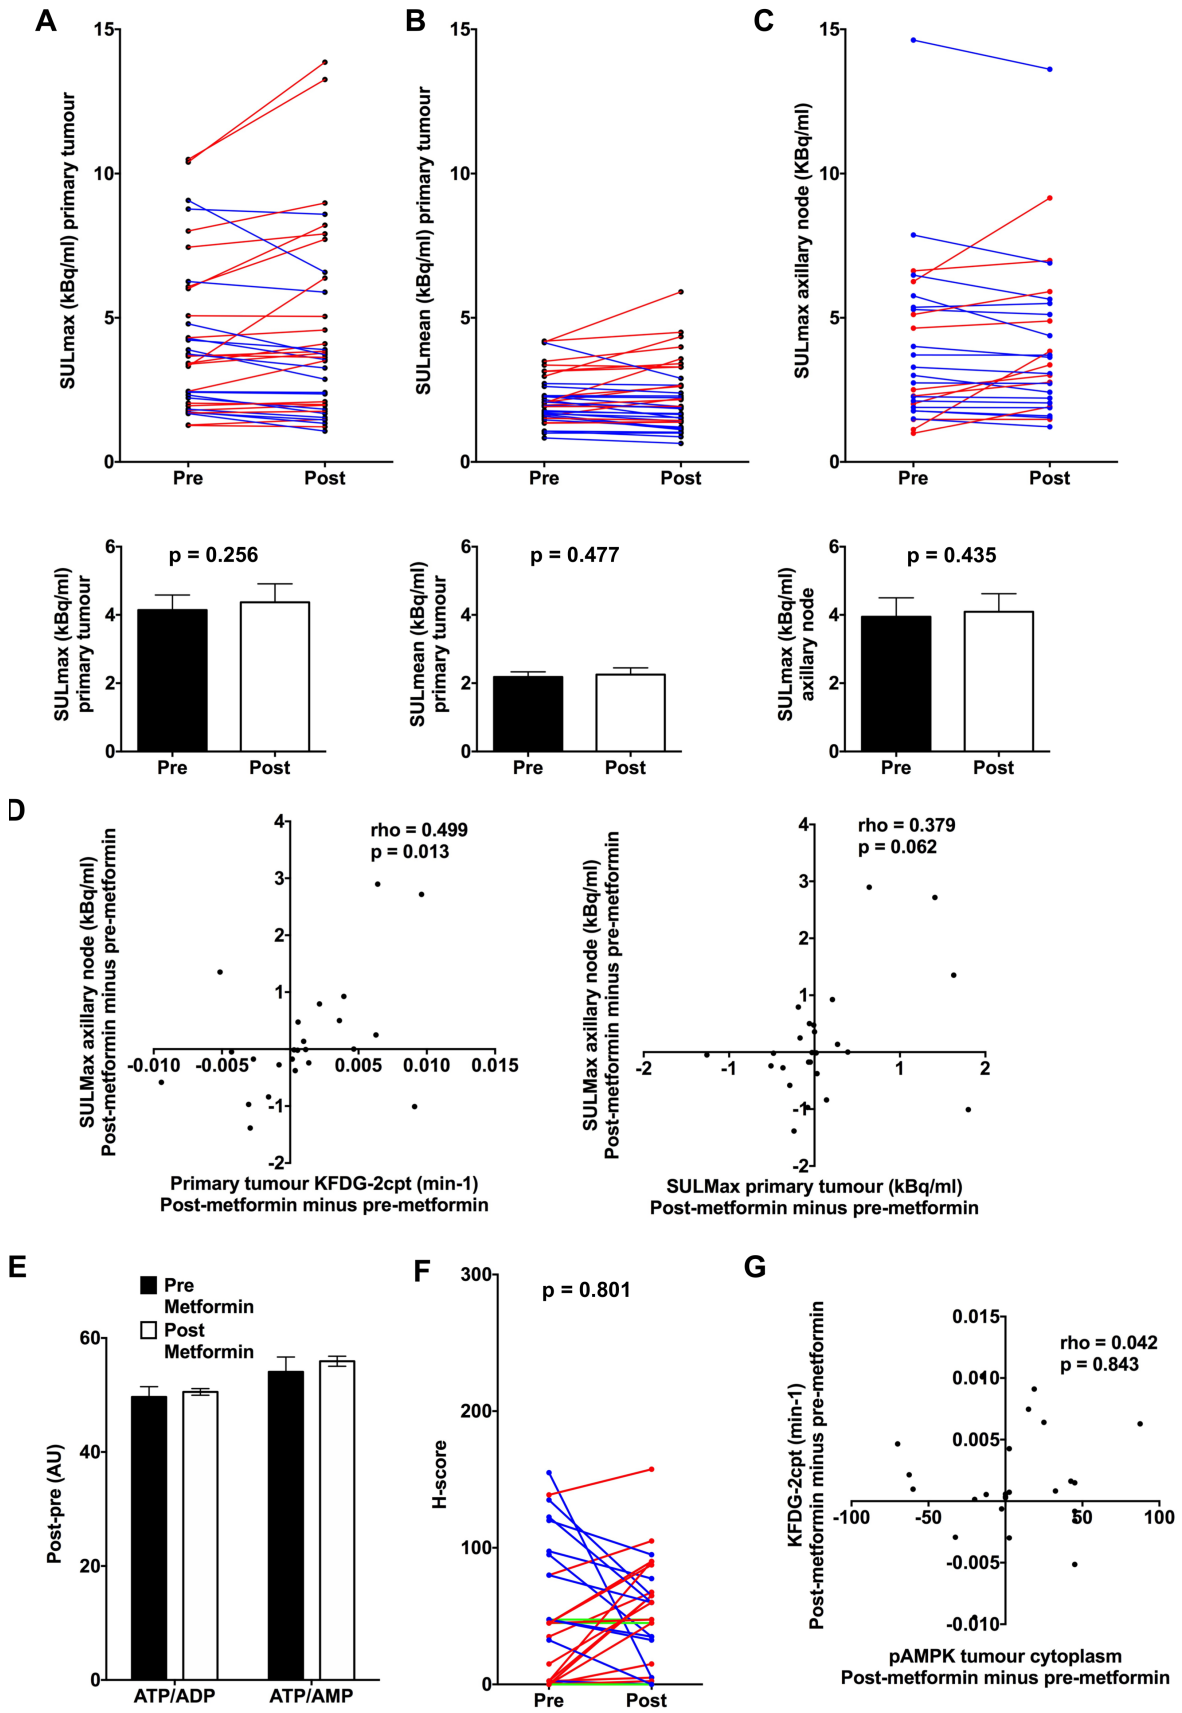

**Fig. S1. Effect of metformin on standardised uptake value of primary breast tumour.**

**Related to Figure 1.**

Change in the **(A)** maximum and **(B)** mean standardised uptake value normalised to lean body mass of the primary tumour in individual patients (upper panel) and overall (lower panel; data shown are mean  $\pm$  SEM) pre- and post-metformin (n=36). **(C)**: Change in maximum standardised uptake value normalised to lean body mass of axillary nodes in individual patients pre- and post-metformin (n=27). **(D)**: Correlation between change in  $K_{\text{FDG-2cpt}}$  (post-metformin minus pre-metformin) and  $\text{SUL}_{\text{Max}}$  for the breast primary tumour, respectively, and change in  $\text{SUL}_{\text{Max}}$  for FDG avid axillary lymph nodes. Spearman's rank correlation coefficient and significance, are shown. **(E)**: ATP/AMP and ATP/ADP ratios pre- and post-metformin (n=29); data shown are mean  $\pm$  SEM. **(F)**: Change in pAMPK of primary tumour measured by immunohistochemistry in individual patients pre- and post-metformin (n=32; red = increase, blue = decrease and green = no change). **(G)**: Correlation between change in  $K_{\text{FDG-2cpt}}$  and pAMPK for the breast primary tumour (both post-metformin minus pre-metformin). Spearman's rank correlation coefficient and significance, are shown.

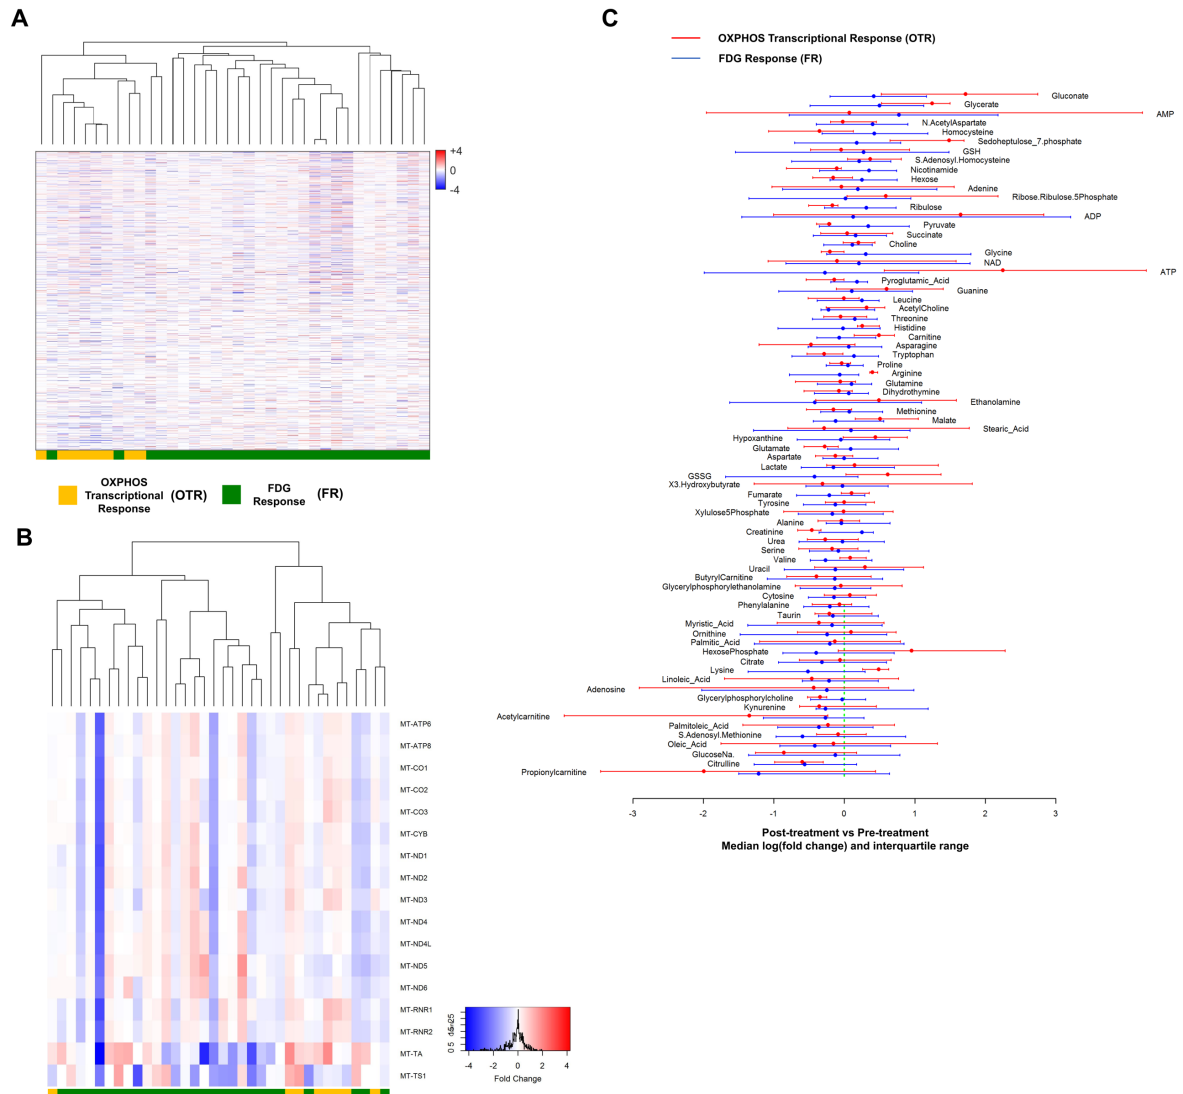

**Fig. S2. Heatmaps of all expressed nuclear and mitochondrial encoded genes following metformin. Related to Figure 2.**

Heatmaps of all expressed nuclear (A) and mitochondrial (B) encoded genes following metformin. Each row represents a gene and each column represents a single patient. Colours reflect the fold change for each gene post-metformin: Red = up-regulation, Blue = down-regulation. Samples were visually clustered using hierarchical clustering (n=36). Patients in OTR (orange) and FR (green) groups shown below. (C): Median log FC and interquartile range for metabolites in OXPPOS transcriptional response (OTR) and FDG response groups.

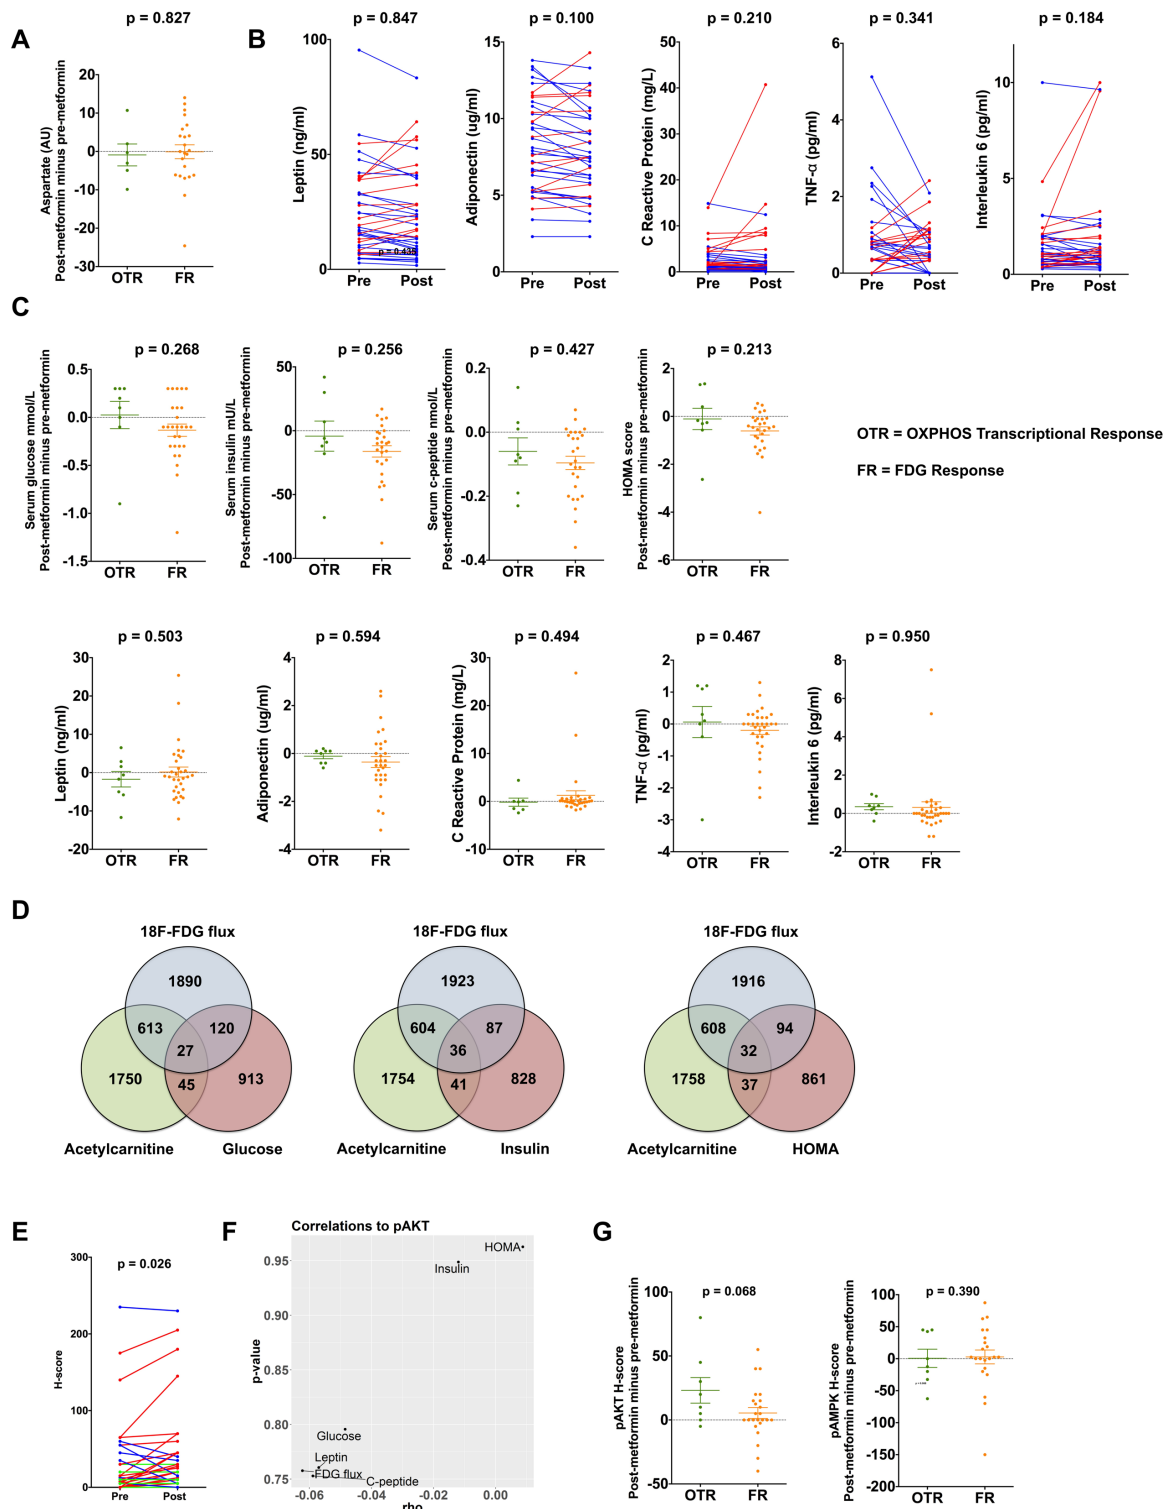

**Fig. S3. Relationship between systemic effects of metformin and tumour metabolic response. Related to Figure 3.**

(A): Scatter plot to show change in tumour aspartate levels for the OTR and FR groups (post-metformin minus pre-metformin). Data shown are mean  $\pm$  SEM and p-value on unpaired t-test (n=29). (B): Pre- and post-metformin levels of serum leptin, adiponectin, C-reactive protein, tumour necrosis factor-alpha and interleukin-6 for individual patients (n=40). (C): Scatter plots to show for the OTR and FR groups change in the systemic metabolic markers, serum glucose, serum insulin, serum c-peptide, HOMA, leptin and adiponectin, and the systemic inflammatory markers, C-reactive protein, tumour necrosis factor-alpha and interleukin-6 (all post-metformin minus pre-metformin). Data shown are mean  $\pm$  SEM and p-value on unpaired t-test (n=36). (D): Venn diagram to show overlap of all genes whose change in expression correlated with change in tumour  $K_{FDG-2cpt}$  and tumour acetylcarnitine and either HOMA, or systemic levels of circulating glucose or insulin. (E): Change in pAKT of primary tumour measured by immunohistochemistry in individual patients pre- and post-metformin (n=32; red = increase, blue = decrease and green = no change). (F): Relationship between change in tumour pAKT and circulating metabolic markers (all post-metformin minus pre-metformin). Spearman's rank correlation coefficient and significance, are shown (n=27). (G): Scatter plots to show change in pAKT and pAMPK of primary tumour for the OTR and FR groups (both post-metformin minus pre-metformin). Data shown are mean  $\pm$  SEM and p-value on unpaired t-test (n=32). (H): Examples of pAKT immunohistochemical staining for individual patients, upper panel: increase after metformin; lower panel: no change after metformin.

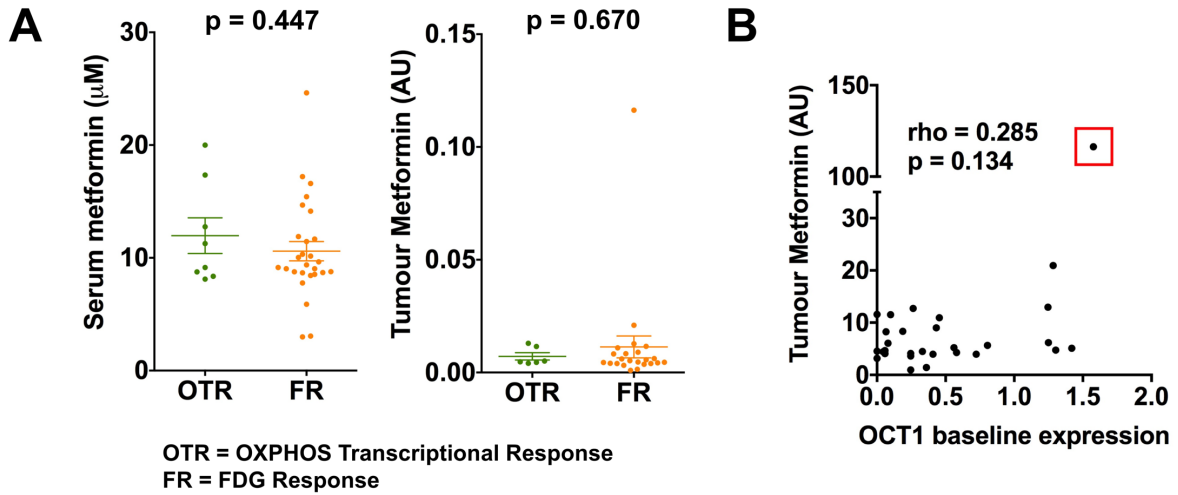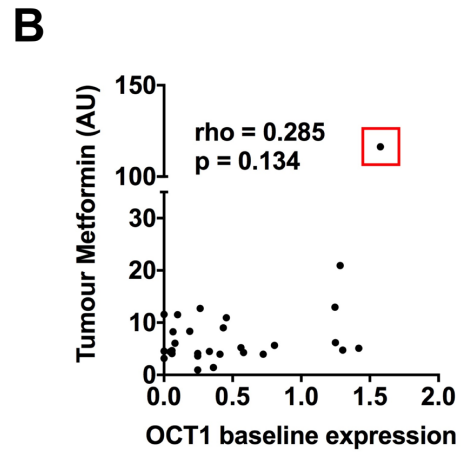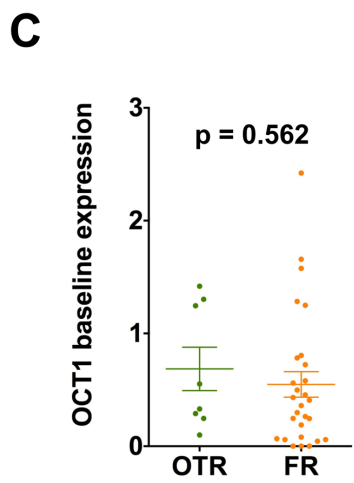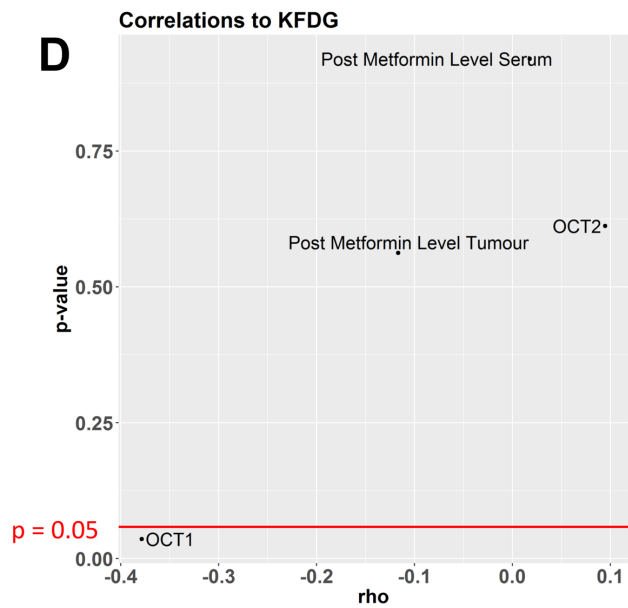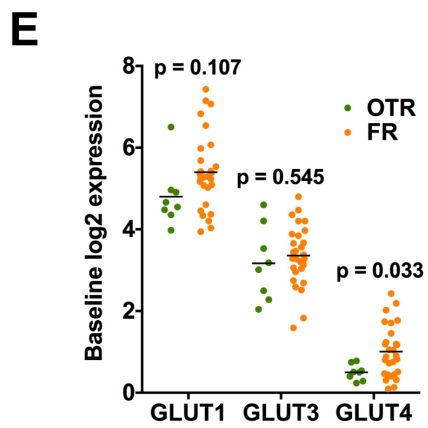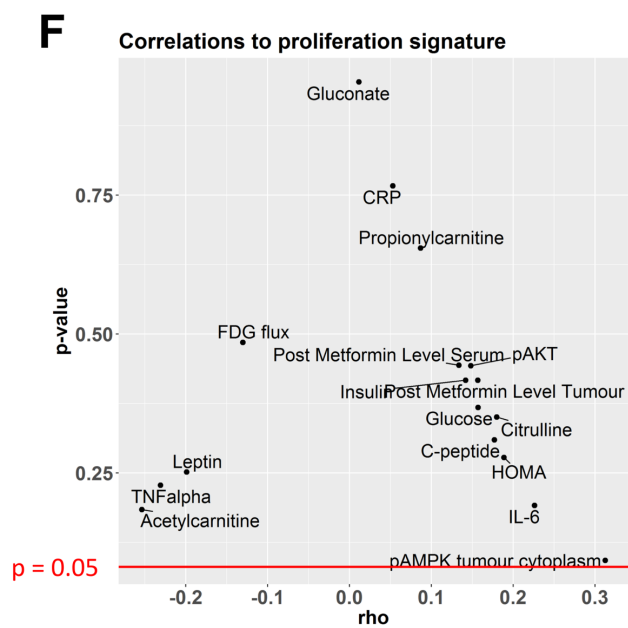



**Fig. S4. Relationship between systemic effects of metformin and tumour metabolic/proliferation response. Related to Figure 3.**

(A): Scatter plots to show serum (n=35) and tumour metformin levels (n=29) for the OTR and FR groups. Data shown are mean  $\pm$  SEM, on unpaired t-test. (B): Correlation between tumour metformin levels and OCT1 baseline expression, patient with highest OCT1 expression and metformin level indicated Venn diagram to show overlap of all genes whose change in expression correlated with change in tumour  $K_{\text{FDG-2cpt}}$  and tumour acetylcarnitine and either HOMA, or systemic levels of circulating glucose or insulin. (C): Scatter plot to show baseline OCT1 gene expression for the OTR and FR groups. Data shown are mean  $\pm$  SEM, on unpaired t-test. (n=36) (D): Relationship between change in tumour  $K_{\text{FDG-2cpt}}$  and OCT1, OCT2, tumour and serum metformin levels (all post-metformin minus pre-metformin). Spearman's rank correlation coefficient and significance, are shown. (E): Scatter plot to show for the OXPHOS transcriptional response group (OTR) and FDG response group (FR) change in GLUT1, GLUT3, and GLUT4 expression (log<sub>2</sub>FC) for the breast primary tumour (GLUT2 not expressed in most tumours). Data shown are mean  $\pm$  SEM, unpaired t-test (n=36). (F): Relationship between change in proliferation gene signature (log<sub>2</sub>FC) with circulating or tumour immunohistochemical markers, metformin levels,  $K_{\text{FDG}}$ , or significantly altered tumour metabolites. Spearman's rank correlation coefficient and significance, are shown.

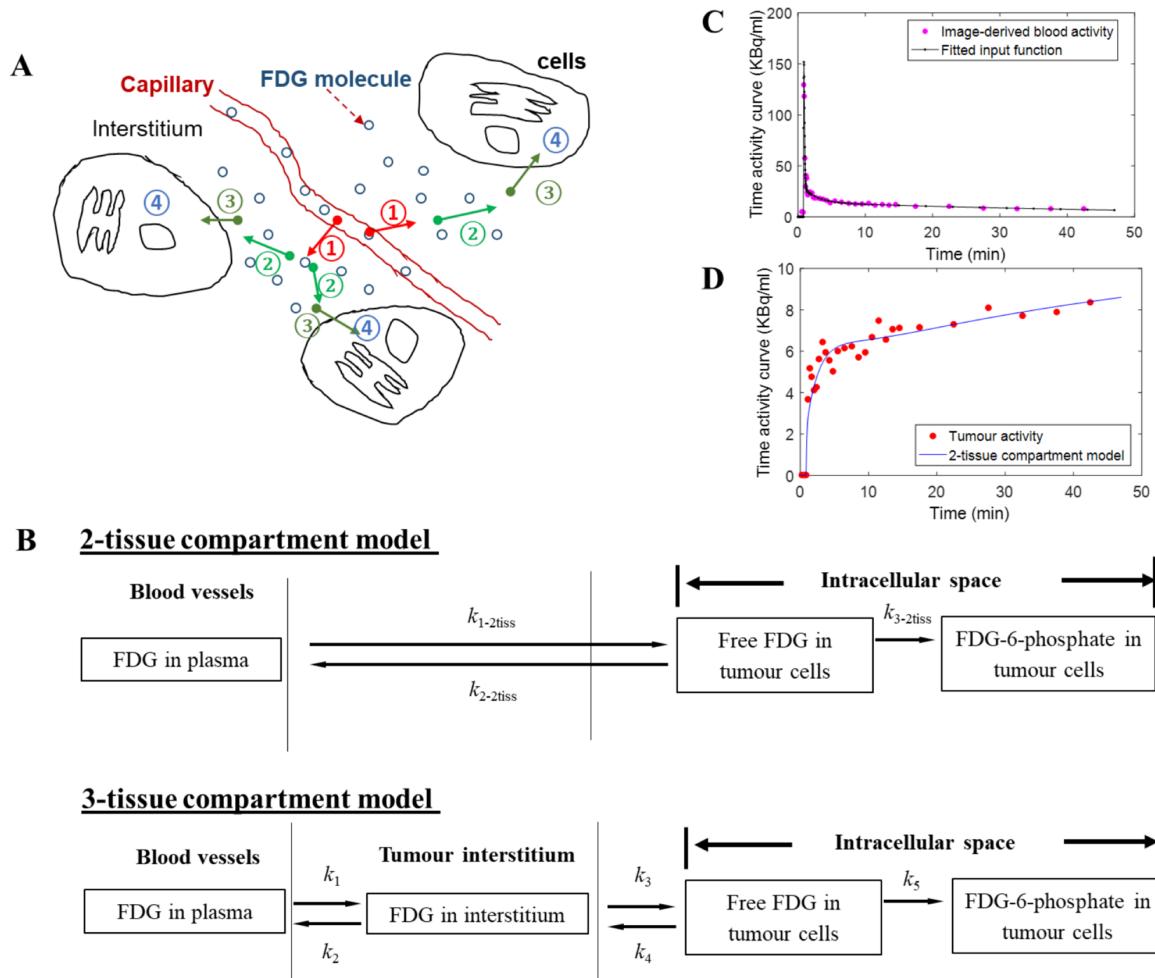

**Fig. S5. Mechanism and modelling of  $^{18}\text{F}$ -FDG. Related to ‘Dynamic PET-CT analysis’ of STAR methods section.**

(A)  $^{18}\text{F}$ -FDG tumour uptake occurs via: ① trans-capillary exchange; ② diffusion through the tumour interstitium; ③ trans-membrane transport to tumour intracellular spaces; and ④ intracellular phosphorylation of  $^{18}\text{F}$ -FDG. (B): two- and three-tissue compartment models describing  $^{18}\text{F}$ -FDG tumour uptake. (C): example of an image-derived blood input function, and (D): fit of the irreversible 2-tissue compartment model (continuous curve) to FDG uptake time-course data (dots) extracted from dynamic images for one patient.

**SUPPLEMENTAL TABLES:**

| <b>Inclusion criteria</b>                                                                                      | <b>Exclusion criteria</b>                                                                                                                                                             |
|----------------------------------------------------------------------------------------------------------------|---------------------------------------------------------------------------------------------------------------------------------------------------------------------------------------|
| Women with a histology proven in situ primary breast cancer $\geq 2$ cm in diameter                            | Radiotherapy, major surgery, significant traumatic injury, endocrine therapy, immunotherapy, chemotherapy or experimental therapy during four weeks prior to starting or during trial |
| Eastern Cooperative Oncology Group (ECOG) performance status 0–1                                               | Pregnancy or breast feeding                                                                                                                                                           |
| Age $\geq 18$ years                                                                                            | History of type 1 or type 2 diabetes                                                                                                                                                  |
| Fasting or random serum glucose less than 7.0 mmol/L                                                           | Treatment with metformin in the past year                                                                                                                                             |
| No prior treatment for breast cancer and scheduled to commence neoadjuvant chemotherapy in $\leq 3$ weeks time | Estimated glomerular filtration rate $< 45$ ml/min                                                                                                                                    |
| Have given written informed consent and are capable of cooperating with protocol                               | Acute or chronic metabolic acidosis                                                                                                                                                   |
| Adequate bone marrow, renal and liver function                                                                 | Known hypersensitivity to metformin                                                                                                                                                   |

**Table S1.** List of key inclusion and exclusion criteria. Related to Figure 1.

|                                         |                                                                       | Number of patients     |    |
|-----------------------------------------|-----------------------------------------------------------------------|------------------------|----|
| <b>Recruitment and samples analysed</b> | Total patient recruitment to study                                    | 41                     |    |
|                                         | Number of paired PET-CT scans available for analysis                  | 36                     |    |
|                                         | Number of paired tumour samples with sufficient material for analysis | Metabolomics           | 29 |
|                                         |                                                                       | RNASeq                 | 36 |
| <b>ER/HER2 status</b>                   | ER positive                                                           | 32                     |    |
|                                         | ER negative                                                           | 9                      |    |
|                                         | HER2 positive                                                         | 8                      |    |
|                                         | HER2 negative                                                         | 33                     |    |
|                                         | Triple negative (ER negative and HER2 negative)                       | 8                      |    |
| <b>Tumour type</b>                      | Ductal carcinoma                                                      | 32                     |    |
|                                         | Lobular carcinoma                                                     | 7                      |    |
|                                         | Mixed ductal and lobular carcinoma                                    | 2                      |    |
|                                         | Grade 1                                                               | 2                      |    |
|                                         | Grade 2                                                               | 24                     |    |
|                                         | Grade 3                                                               | 15                     |    |
|                                         | Median tumour size (on magnetic resonance imaging)                    | 49mm (range 30–147)    |    |
| <b>Patient characteristics</b>          | Median age at study entry                                             | 49 years (range 27–67) |    |
|                                         | Median body mass index                                                | 28.1 (range 19.6–45.3) |    |

**Table S2.** Tumour and patient characteristics (for the 29 paired samples included in the general metabolomics analysis). Related to Figure 1.

| <b>Dynamic Imaging Variable</b> | <b>p-value</b>       |                 |                     |
|---------------------------------|----------------------|-----------------|---------------------|
|                                 | <b>Paired t-test</b> | <b>Wilcoxon</b> | <b>Mann-Whitney</b> |
| K1                              | 0.145                | 0.162           | 0.341               |
| k2                              | 0.055                | 0.128           | 0.521               |
| k3                              | 0.343                | 0.053           | 0.392               |
| Kflux (KFDG-2cpt(min-1))        | 0.041                | 0.027           | 0.510               |
| SUVmean                         | 0.918                | 0.271           | 0.356               |
| TBRmean                         | 0.255                | 0.540           | 0.540               |
| MRglu                           | 0.141                | 0.285           | 0.285               |

**Table S3.** P-values for all dynamic imaging variables using 3 different statistical tests, 2-tailed paired t-test; 2-sided Wilcoxon signed rank test; Mann-Whitney U-test. Related to Figure 1.

| Pathway                                    | KEGG ID | p-value* |
|--------------------------------------------|---------|----------|
| Peroxisome                                 | 04146   | <0.001   |
| Arginine & proline metabolism              | 00330   | <0.001   |
| Valine, leucine & isoleucine degradation   | 00280   | <0.001   |
| Pyruvate metabolism                        | 00620   | 0.001    |
| Glutathione metabolism                     | 00480   | 0.002    |
| Citrate cycle                              | 00020   | 0.004    |
| Propanoate metabolism                      | 00640   | 0.005    |
| Fatty acid degradation                     | 00071   | 0.005    |
| Alanine & aspartate & glutamate metabolism | 00250   | 0.005    |
| Cysteine & methionine metabolism           | 00270   | 0.007    |
| Lysine degradation                         | 00310   | 0.009    |
| Glycine, serine & threonine metabolism     | 00260   | 0.011    |
| Huntingdon's disease                       | 05016   | 0.016    |
| Histidine metabolism                       | 00340   | 0.023    |
| PPAR signalling pathway                    | 00320   | 0.030    |
| Oxidative phosphorylation                  | 00190   | 0.033    |
| Ascorbate & aldarate metabolism            | 00053   | 0.033    |
| Alzheimer's disease                        | 05010   | 0.034    |
| Glycolysis & gluconeogenesis               | 00010   | 0.040    |

**Table S4.** List of KEGG pathways linked to mitochondrial metabolism that were significantly upregulated following metformin treatment. \* corrected Hypergeometric p-value. Related to Figure 2.

| Circulating marker                   | Pre-metformin |      | Post-metformin |      | p-value* |
|--------------------------------------|---------------|------|----------------|------|----------|
|                                      | Mean          | SEM  | Mean           | SEM  |          |
| Glucose (mmol/L)                     | 4.94          | 0.08 | 4.82           | 0.45 | 0.032    |
| Insulin (mU/L)                       | 81.0          | 8.01 | 70.2           | 6.93 | 0.005    |
| C-peptide (nmol/L)                   | 0.59          | 0.04 | 0.50           | 0.03 | <0.001   |
| HOMA score                           | 2.60          | 0.28 | 2.17           | 0.22 | 0.006    |
| Leptin (ng/ml)                       | 24.3          | 3.05 | 24.1           | 3.08 | 0.847    |
| Adiponectin (ug/ml)                  | 8.26          | 0.49 | 7.92           | 0.48 | 0.100    |
| C-reactive protein (mg/L)            | 2.75          | 0.54 | 3.76           | 1.12 | 0.210    |
| Tumour necrosis factor alpha (pg/ml) | 0.74          | 0.16 | 0.60           | 0.10 | 0.341    |
| Interleukin 6 (pg/ml)                | 1.50          | 0.26 | 1.82           | 0.40 | 0.184    |

**Table S5.** List of circulating markers tested. SEM, standard error of mean. \* 2-tailed paired t-test. Related to Figure 3.

| <b>Gene</b> | <b>Full name</b>                            | <b>Brite hierarchy</b>  |                                             |
|-------------|---------------------------------------------|-------------------------|---------------------------------------------|
| COX7B       | cytochrome c oxidase subunit 7B             | Energy metabolism       | Oxidative phosphorylation                   |
| NDUFA4      | NDUFA4, mitochondrial complex associated    | Energy metabolism       | Oxidative phosphorylation                   |
| NDUFS4      | NADH:ubiquinone oxidoreductase subunit S4   | Energy metabolism       | Oxidative phosphorylation                   |
| AMY2B       | amylase, alpha 2B (pancreatic)              | Carbohydrate metabolism | Starch and sucrose metabolism               |
| FBP1        | fructose-bisphosphatase 1                   | Carbohydrate metabolism | Glycolysis / Gluconeogenesis                |
|             |                                             |                         | Pentose phosphate pathway                   |
|             |                                             |                         | Fructose and mannose metabolism             |
| GALK1       | galactokinase 1                             | Carbohydrate metabolism | Galactose metabolism                        |
|             |                                             |                         | Amino sugar and nucleotide sugar metabolism |
| GYS1        | glycogen synthase 1                         | Carbohydrate metabolism | Starch and sucrose metabolism               |
| MGAM2       | maltase-glucoamylase 2 (putative)           | Carbohydrate metabolism | Galactose metabolism                        |
|             |                                             |                         | Starch and sucrose metabolism               |
| PLCG1       | phospholipase C gamma 1                     | Carbohydrate metabolism | Inositol phosphate metabolism               |
| DNMT3B      | DNA methyltransferase 3 beta                | Amino acid metabolism   | Cysteine and methionine metabolism          |
| GCLC        | glutamate-cysteine ligase catalytic subunit | Amino acid metabolism   | Cysteine and methionine metabolism          |
|             |                                             |                         | Glutathione metabolism                      |
| POLR2J2     |                                             |                         | Purine metabolism                           |

|         |                                                    |                                           |                                                            |
|---------|----------------------------------------------------|-------------------------------------------|------------------------------------------------------------|
|         | RNA polymerase II subunit J2                       | Nucleotide metabolism                     | Pyrimidine metabolism                                      |
| POLR3GL | RNA polymerase III subunit G like                  | Nucleotide metabolism                     | Purine metabolism                                          |
|         |                                                    |                                           | Pyrimidine metabolism                                      |
| UBP1    | beta-ureidopropionase 1                            | Nucleotide metabolism                     | Pyrimidine metabolism                                      |
|         |                                                    | Metabolism of other amino acids           | beta-Alanine metabolism                                    |
|         |                                                    | Metabolism of cofactors and vitamins      | Pantothenate and CoA biosynthesis                          |
|         |                                                    | Xenobiotics biodegradation and metabolism | Drug metabolism - other enzymes                            |
| HGSNAT  | heparan-alpha-glucosaminide N-acetyltransferase    | Glycan biosynthesis and metabolism        | Glycosaminoglycan degradation                              |
| MAN2A2  | mannosidase alpha class 2A member 2                | Glycan biosynthesis and metabolism        | N-Glycan biosynthesis                                      |
| ST3GAL1 | ST3 beta-galactoside alpha-2,3-sialyltransferase 1 | Glycan biosynthesis and metabolism        | Mucin type O-glycan biosynthesis                           |
|         |                                                    |                                           | Glycosaminoglycan biosynthesis - keratan sulfate           |
|         |                                                    |                                           | Glycosphingolipid biosynthesis - globo and isoglobo series |
|         |                                                    |                                           | Glycosphingolipid biosynthesis - ganglio series            |
| NADSYN1 | NAD synthetase 1                                   | Metabolism of cofactors and vitamins      | Nicotinate and nicotinamide metabolism                     |

**Table S6.** List of all KEGG annotated metabolism genes whose change in expression correlated with both change in tumour  $K_{FDG-2cpt}$  and tumour acetylcarnitine levels. Related to Figure 3.
